# Supplementary material for: Study on the decisive factor for metal–insulator transitions in a LaVO3 Mott–Hubbard insulator
Source: Royal Society of Chemistry journal article supplement (doi:10.1039/d2cp05127c), 2023-01-01
Supplement: d2cp05127c1.pdf [file d2cp05127c1.pdf]

## Supplementary Information

### Study on the decisive factor for metal-insulator transition in $\text{LaVO}_3$ Mott-Hubbard insulator

Mohammad Nasir<sup>1</sup>, Inseo Kim<sup>2</sup>, Kimoon Lee<sup>2,\*</sup>, Sang Il Kim<sup>3</sup>, Kyu Hyoung Lee<sup>4</sup>, Hee Jung Park<sup>1,\*</sup>

<sup>1</sup>Department of Materials Science and engineering, Dankook University, Cheonan, 31116, Republic of Korea

<sup>2</sup>Department of Physics, Kunsan National University, Gunsan 54150, Republic of Korea.

<sup>3</sup>Department of Materials Science and Engineering, University of Seoul, Seoul 02504, Republic of Korea

<sup>4</sup>Department of Materials Science and Engineering, Yonsei University, Seoul 03722, Republic of Korea

\*Corresponding author's email address: [parkjang@dankook.ac.kr](mailto:parkjang@dankook.ac.kr) (Hee Jung Park)

[kimoon.lee@kunsan.ac.kr](mailto:kimoon.lee@kunsan.ac.kr) (Kimoon Lee)

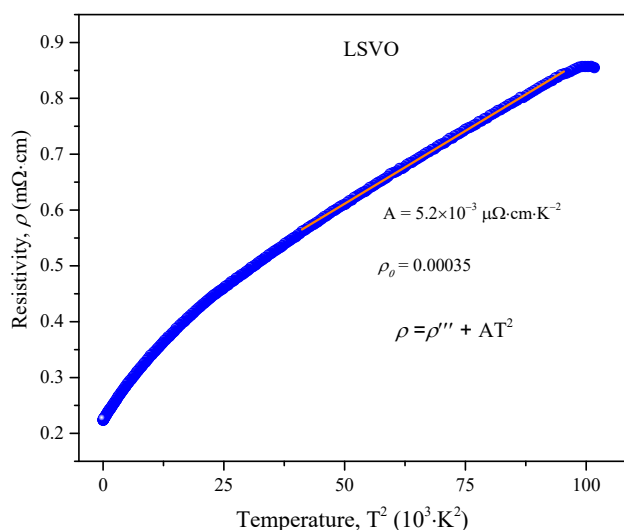

**Fig. S1.** Unsatisfactory fit of resistivity using Fermi-liquid-like behavior for LSVO.

**Table SI.** The goodness of fitting, selected bond lengths, orthorhombic lattice strain, tolerance factor, and octahedral distortion parameters obtained from structural refinement of XRD data of LVO, LCVO, and LSVO.

| Sample                                  | LVO       | LCVO      | LSVO      |
|-----------------------------------------|-----------|-----------|-----------|
| <i>c/a</i> ratio                        | 1.413     | 1.412     | 1.410     |
| GOF                                     | 10.7      | 11.8      | 17.4      |
| <V–O1> (Å)                              | 1.999(3)  | 1.964(1)  | 1.965(2)  |
| <V–O2> (Å)                              | 2.018 (9) | 1.973 (1) | 1.987(1)  |
| <V–O2> (Å)                              | 1.983 (9) | 1.970 (1) | 1.972(1)  |
| <V–O> (Å)                               | 2.000 (1) | 1.969 (1) | 1.974 (1) |
| Orthorhombic lattice strain             | 0.00027   | -0.0010   | -0.0060   |
| Octahedral distortion $10^{-7}\Delta_d$ | 0.83      | 0.86      | 3.4       |
| Tolerance factor                        | 0.911     | 0.908     | 0.920     |

**Table SII.** Peak parameters obtained from the deconvolution of V 2p together with O 1s spectra for LVO, LCVO, and LSVO.

| Samples                                |                      | LVO             |               | LCVO      |               | LSVO      |               |
|----------------------------------------|----------------------|-----------------|---------------|-----------|---------------|-----------|---------------|
| Peak types                             | Peak parameters      | FWHM (eV)       | Position (eV) | FWHM (eV) | Position (eV) | FWHM (eV) | Position (eV) |
|                                        | $2p_{3/2}$           | V <sup>3+</sup> | 2.3           | 516.1     | 1.9           | 515.9     | 2.0           |
| V <sup>4+</sup>                        |                      | 1.3             | 517.0         | 1.3       | 517.1         | 1.3       | 517.1         |
| $2p_{1/2}$                             | V <sup>3+</sup>      | 3.0             | 523.5         | 3.0       | 523.3         | 3.0       | 523.1         |
|                                        | V <sup>4+</sup>      | 2.9             | 524.4         | 2.8       | 524.5         | 2.9       | 524.4         |
| O 1s                                   | 1 <sup>st</sup> peak | 1.4             | 529.8         | 1.5       | 529.9         | 1.5       | 529.8         |
|                                        | 2 <sup>nd</sup> peak | 2.5             | 531.6         | 2.3       | 531.5         | 2.7       | 531.7         |
| Ratio V <sup>4+</sup> /V <sup>3+</sup> |                      | 1.1             |               | 1.6       |               | 1.9       |               |

**Table III.** Room temperature conductivity, Seebeck coefficient, carrier concentration and mobility.

| Sample | $\sigma$ (S/cm) | $S$ ( $\mu\text{V/K}$ ) | $PF$ ( $\text{mW/mK}^2$ ) | $p$ ( $10^{22} \text{ cm}^{-3}$ ) | $\mu$ ( $\text{cm}^2/\text{Vs}$ ) |
|--------|-----------------|-------------------------|---------------------------|-----------------------------------|-----------------------------------|
| LVO    | 0.09            | 441.5                   | 1.87                      |                                   |                                   |
| LCVO   | 804.5           | 2.5                     | 0.51                      | 1.13                              | 0.443                             |
| LSVO   | 908.9           | 0.47                    | 0.10                      | 1.12                              | 0.517                             |

**Table SIV.** Electrical parameters obtained from modeling resistivity data using equations (5-9)

| Sample | $E_a$<br>(eV) | $\rho'$<br>( $\Omega\cdot\text{cm}$ ) | $\rho''$<br>( $\Omega\cdot\text{cm}$ ) | $T_0$<br>(K)      | $N(E_F)$<br>( $\text{eV}^{-1}\cdot\text{cm}^{-3}$ ) | $\rho'''$<br>( $\Omega\cdot\text{cm}$ ) | $A$<br>( $\mu\Omega\cdot\text{cm}\cdot\text{K}^2$ ) |
|--------|---------------|---------------------------------------|----------------------------------------|-------------------|-----------------------------------------------------|-----------------------------------------|-----------------------------------------------------|
| LVO    | 0.16          | 1.7                                   | $2 \times 10^{-15}$                    | $4.7 \times 10^8$ | $2.4 \times 10^{19}$                                |                                         |                                                     |
| LCVO   |               |                                       |                                        |                   |                                                     | 0.00084                                 | $(1.5/1.1) \times 10^{-2}$                          |
| LSVO   |               |                                       |                                        |                   |                                                     | 0.00022                                 | $1.2 \times 10^{-1}$                                |
